# Supplementary material for: Magnetically Separable and Recyclable Fe3O4-Supported Ag Nanocatalysts for Reduction of Nitro Compounds and Selective Hydration of Nitriles to Amides in Water
Source: MDPI journal article supplement (doi:10.3390/molecules19010699), 2014-01-07

# Supporting Information

## GC-MS Data

**Figure S1.** Benzamide (Table 3, entry 5). (a) Retention time-intensity graph; and (b)  $m/z$  value-intensity graph.

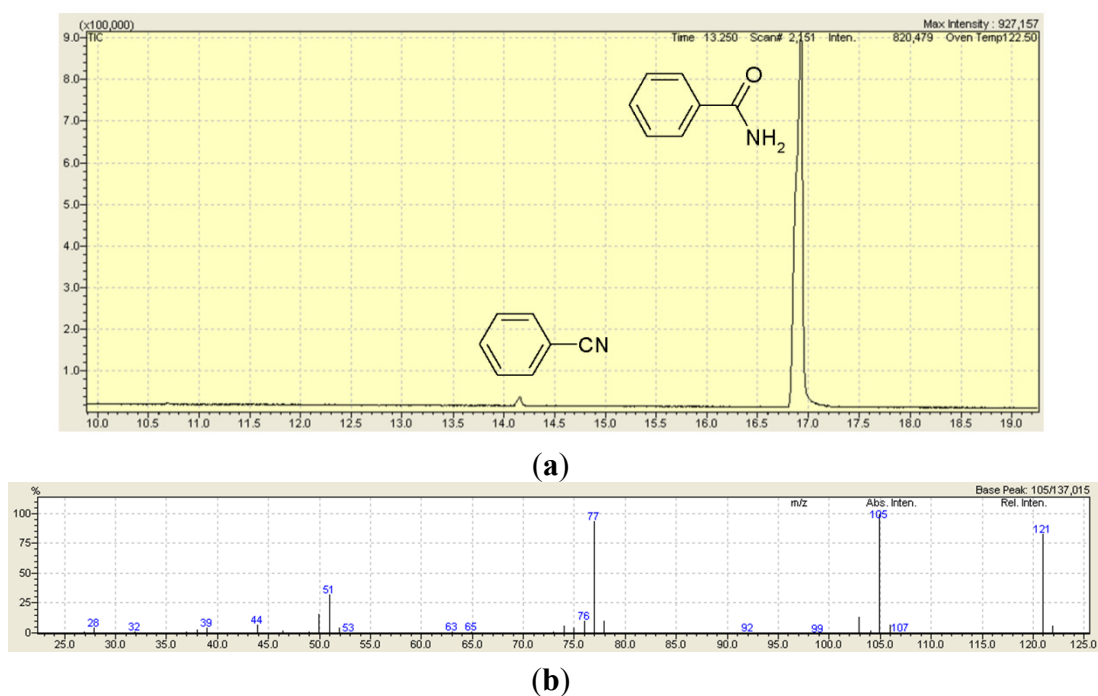

**Figure S2.** 4-Chlorobenzamide (Table 4, entry 1). (a) Retention time-intensity graph; and (b)  $m/z$  value-intensity graph.

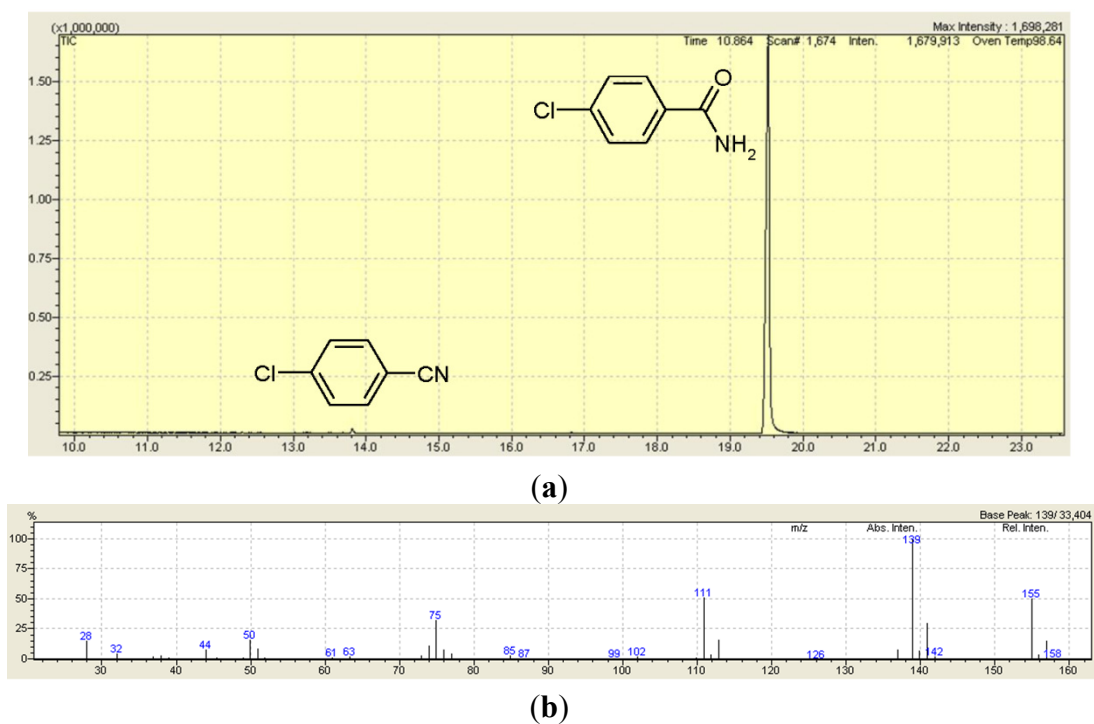

**Figure S3.** 4-Bromobenzamide (Table 4, entry 2). (a) Retention time-intensity graph; and (b)  $m/z$  value-intensity graph.

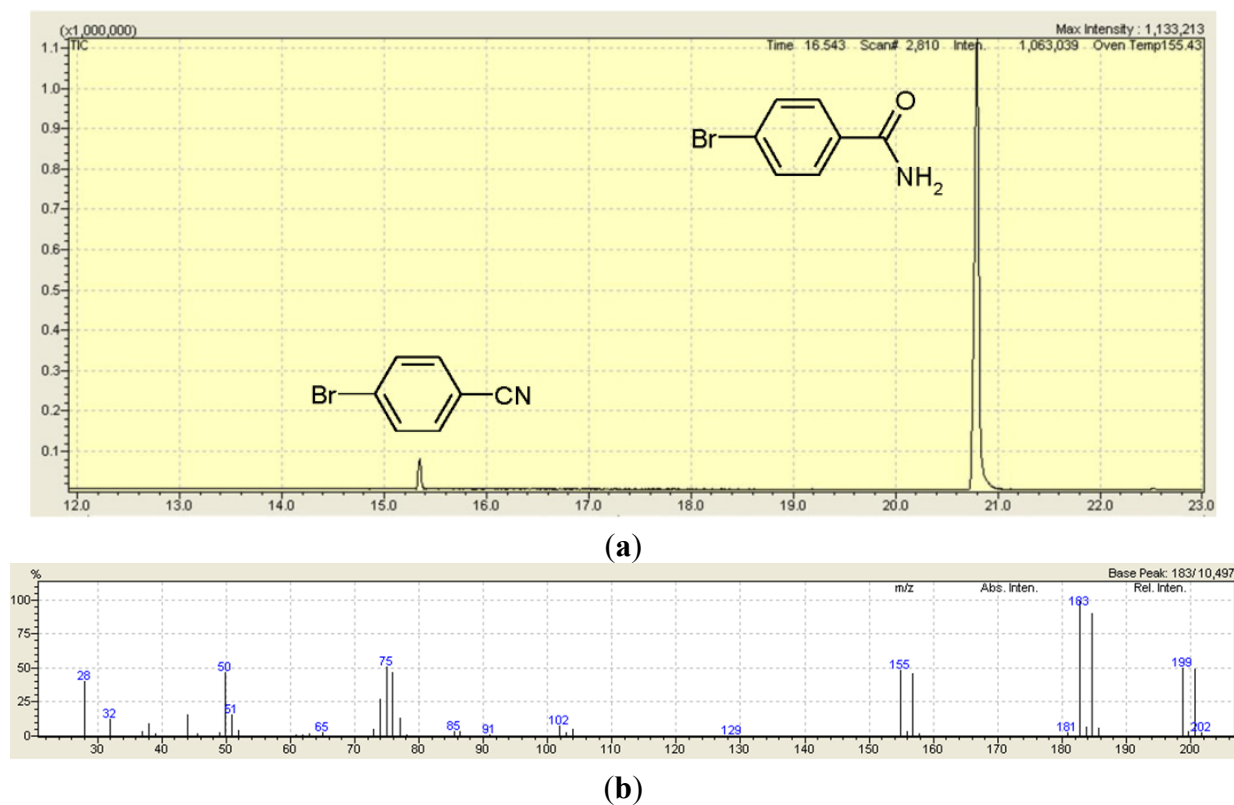

**Figure S4.** 4-nitrobenzamide (Table 4, entry 3). (a) Retention time-intensity graph; and (b)  $m/z$  value-intensity graph.

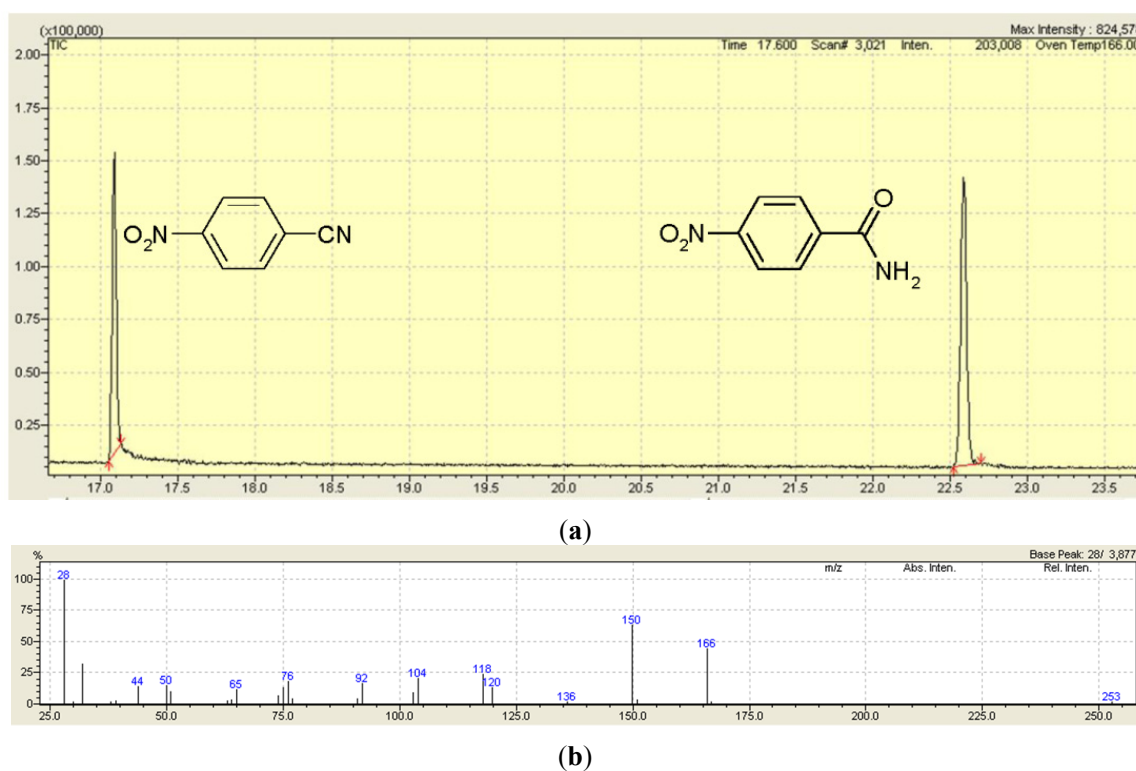

**Figure S5.** 4-aminobenzamide (Table 4, entry 4). (a) Retention time-intensity graph; and (b)  $m/z$  value-intensity graph.

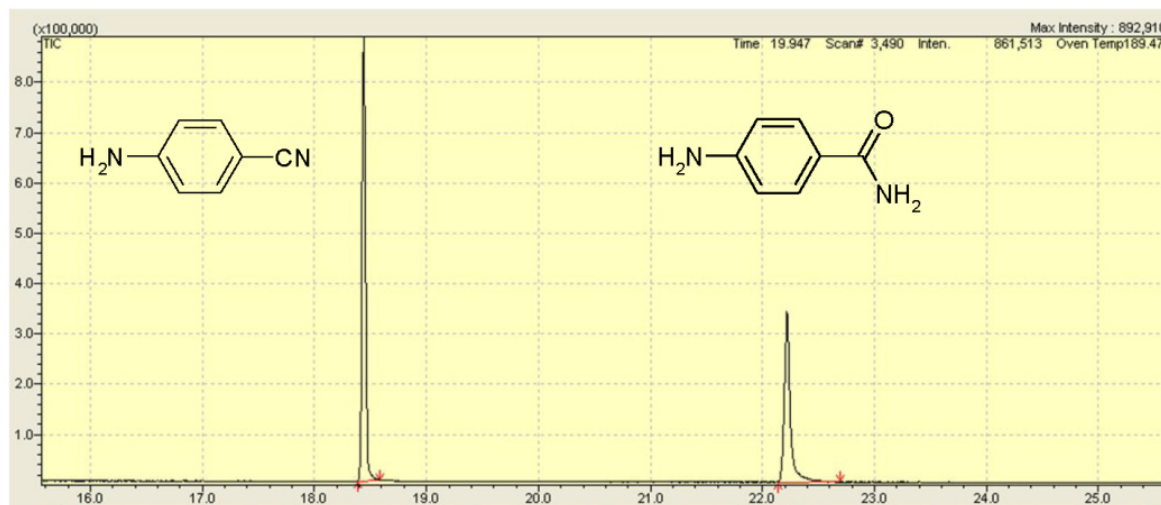

(a)

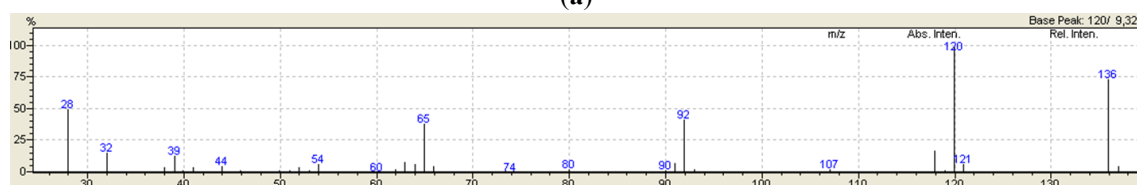

(b)

**Figure S6.** 4-Methylbenzamide (Table 4, entry 5). (a) Retention time-intensity graph; and (b)  $m/z$  value-intensity graph.

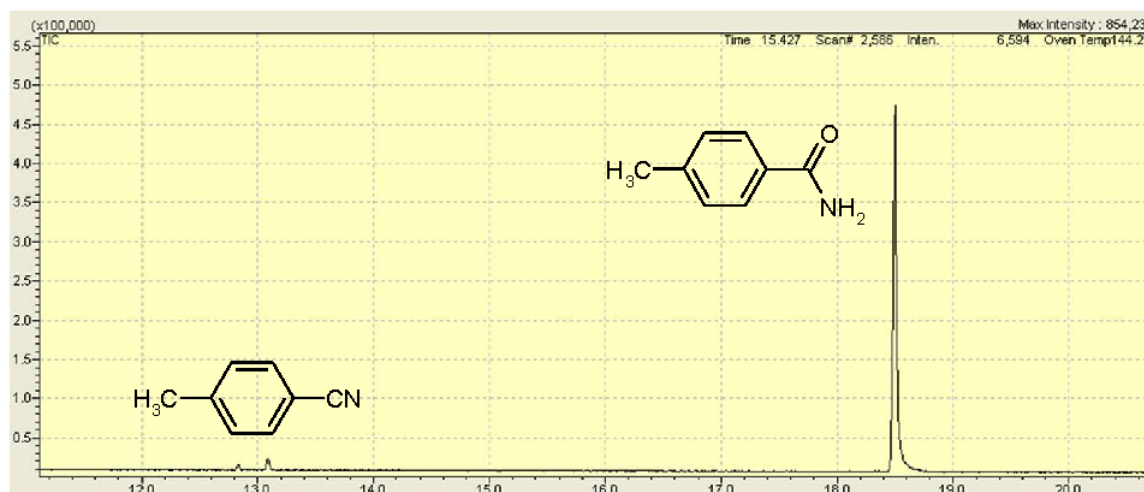

(a)

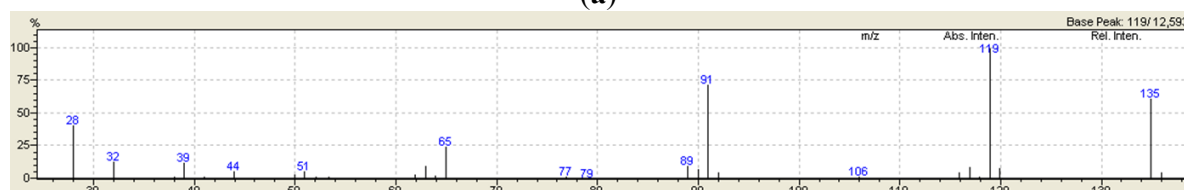

(b)

**Figure S7.** 3-methylbenzamide (Table 4, entry 6). (a) Retention time-intensity graph; and (b)  $m/z$  value-intensity graph.

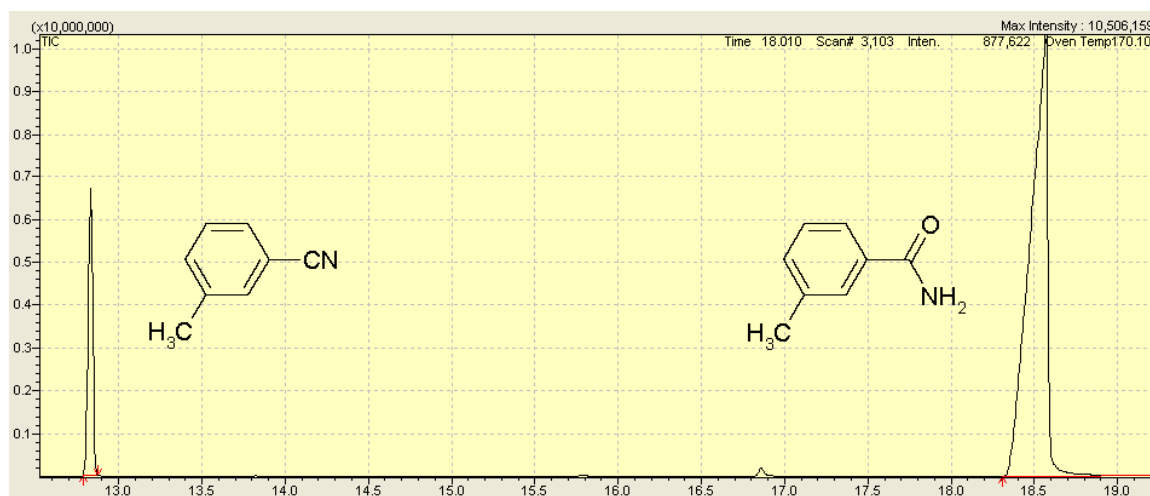

(a)

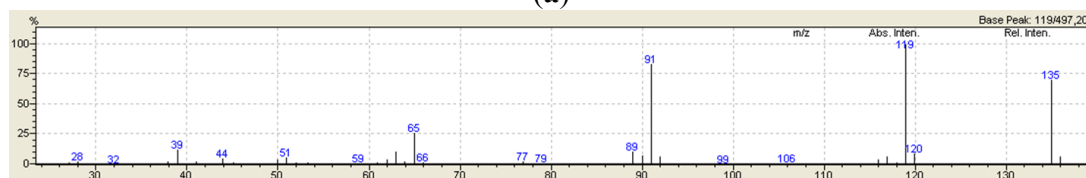

(b)

**Figure S8.** 2-methylbenzamide (Table 4, entry 7). (a) Retention time-intensity graph; and (b)  $m/z$  value-intensity graph.

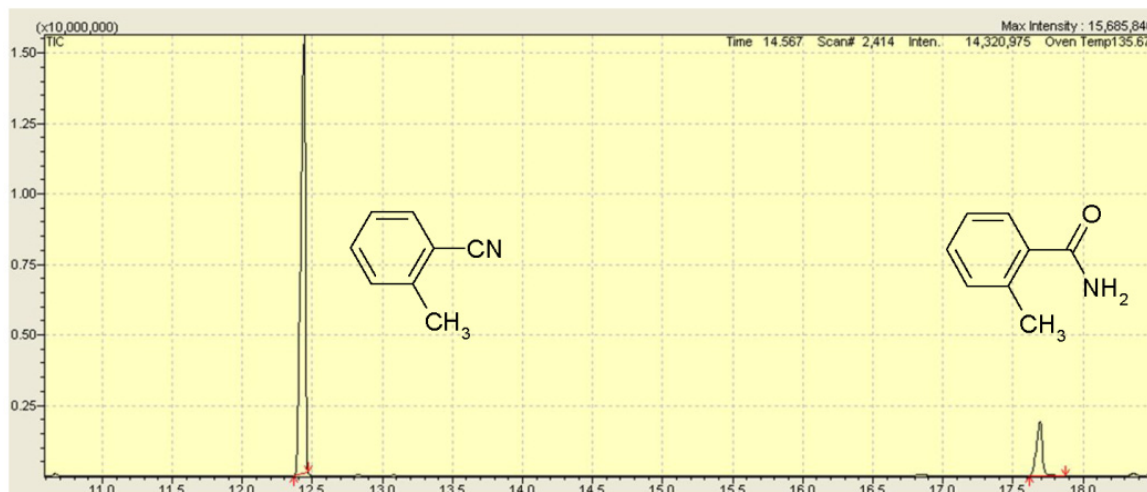

(a)

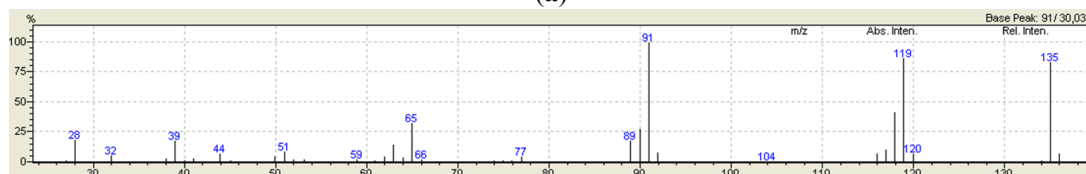

(b)

**Figure S9.** Acetamide (Table 4, entry 8). (a) Retention time-intensity graph; and (b)  $m/z$  value-intensity graph.

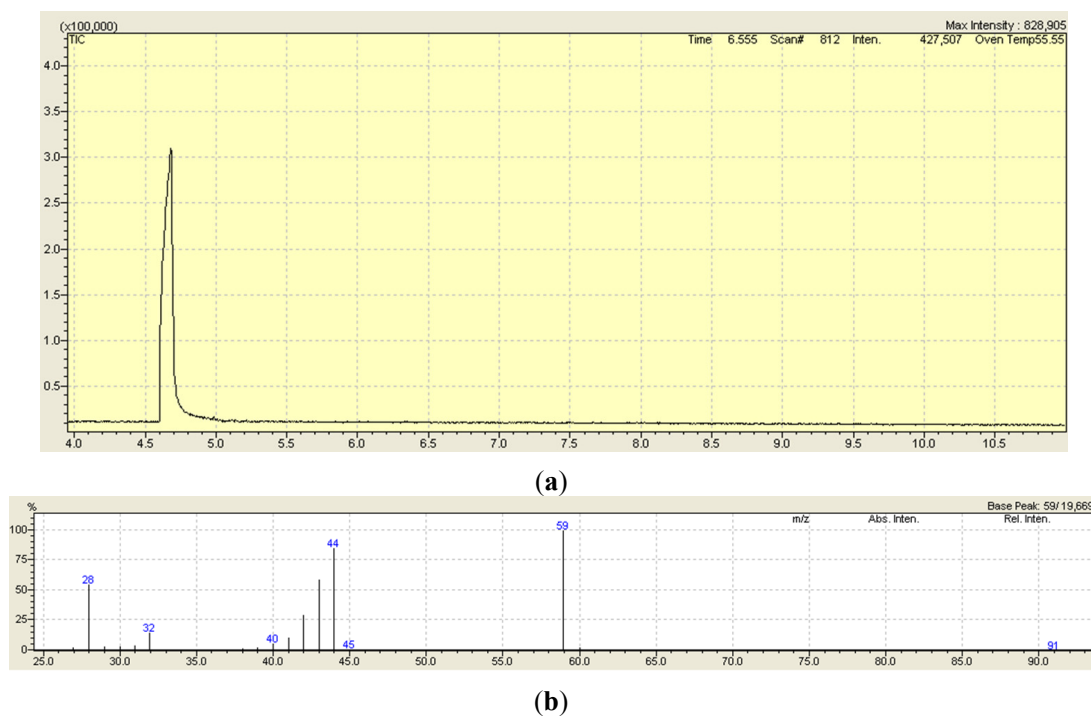

**Figure S10.** Acrylamide (Table 4, entry 9). (a) Retention time-intensity graph; and (b)  $m/z$  value-intensity graph.

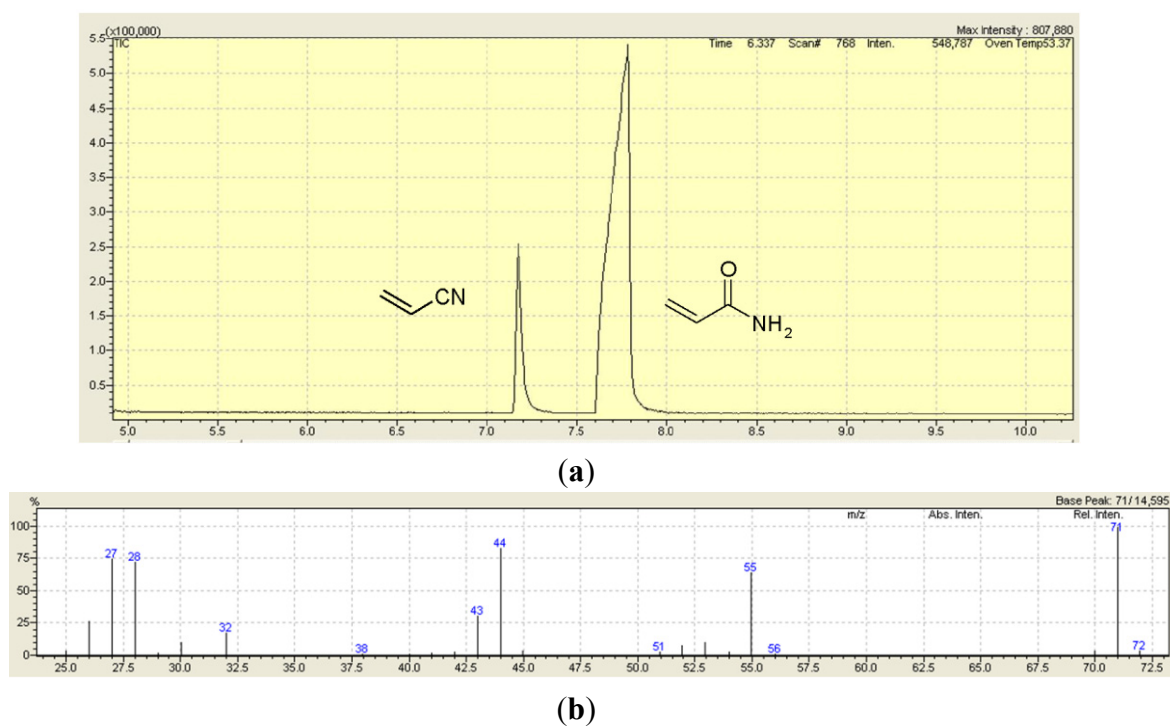

Supplement: s1 [file s1]
